# Supplementary material for: Mild Muscle Mitochondrial Fusion Distress Extends Drosophila Lifespan through an Early and Systemic Metabolome Reorganization
Source: MDPI journal article supplement (doi:10.3390/ijms222212133), 2021-11-09
Supplement: s1 [file s1]

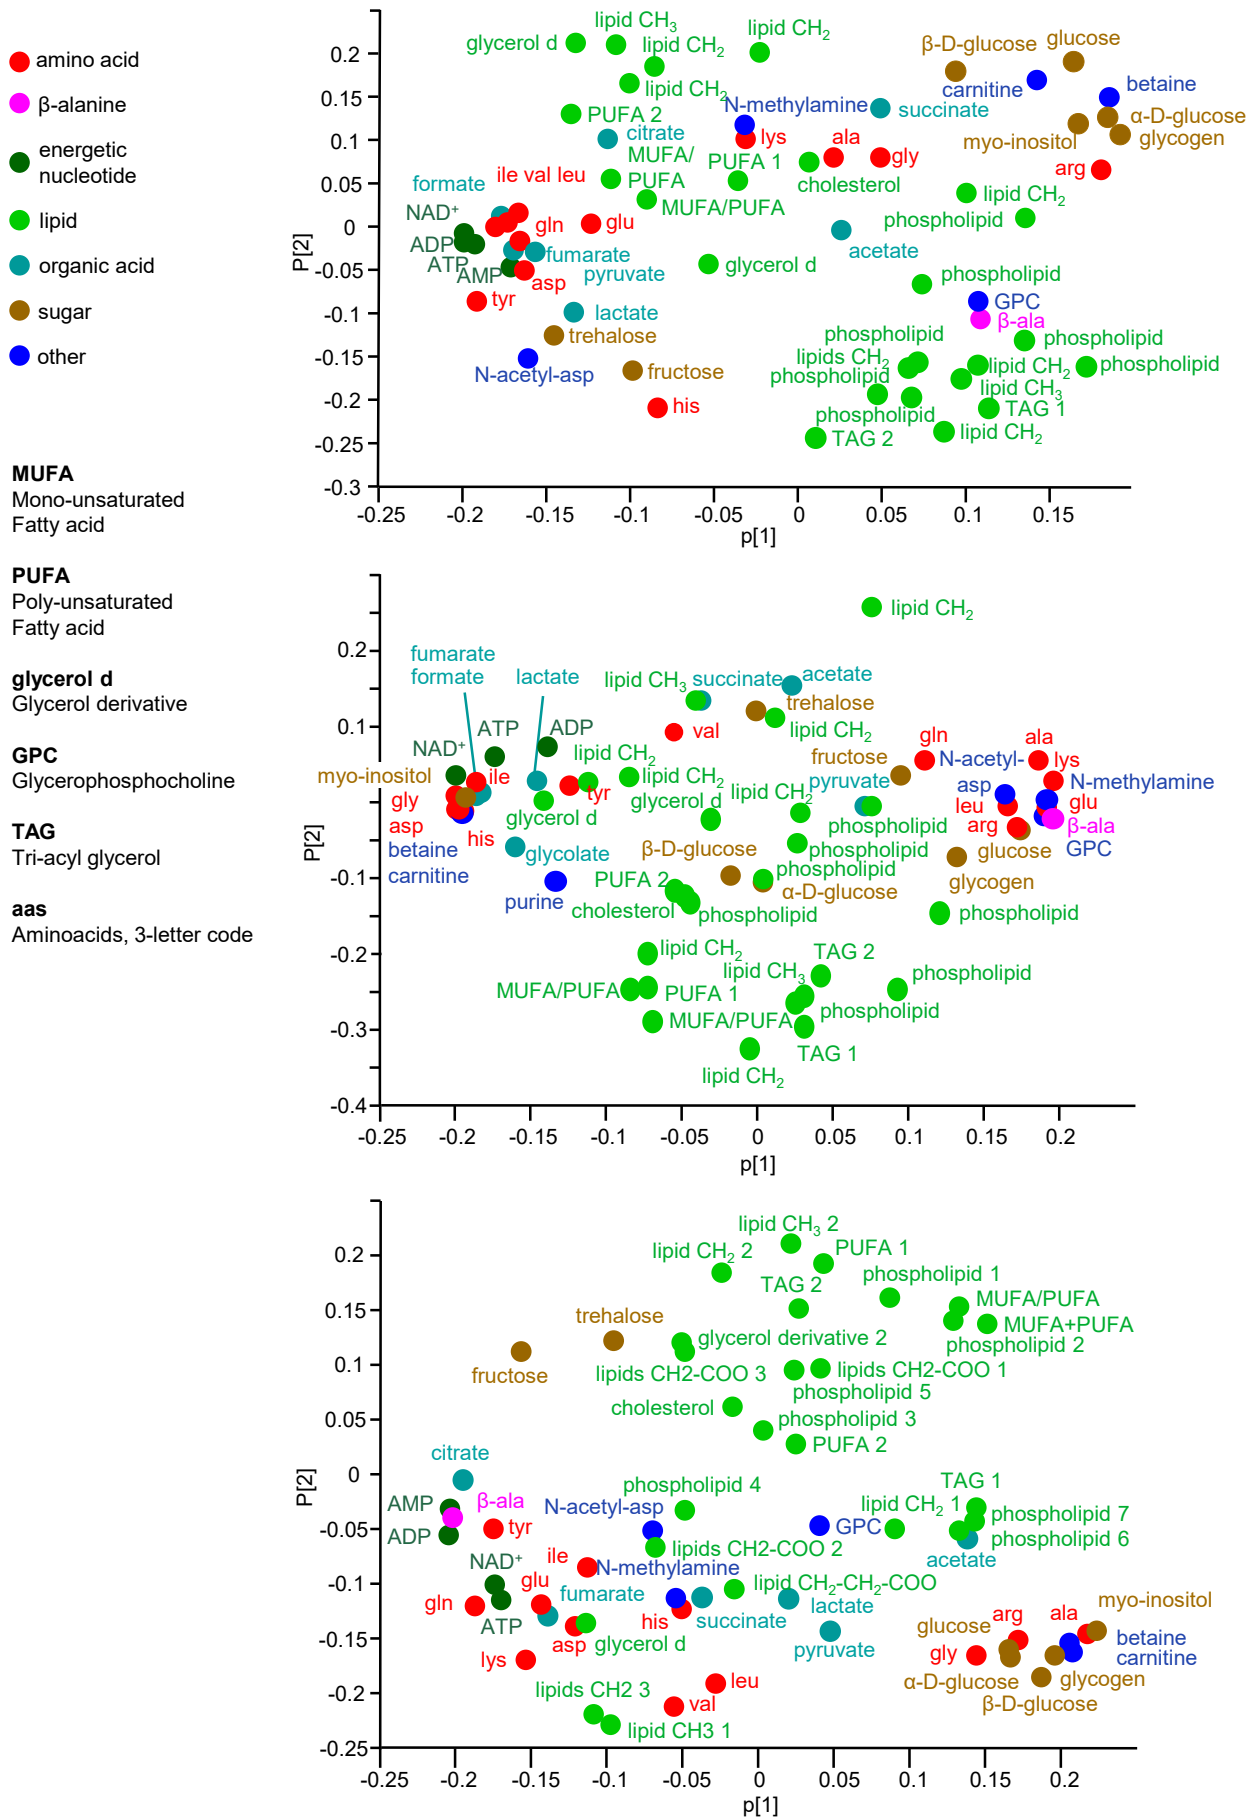

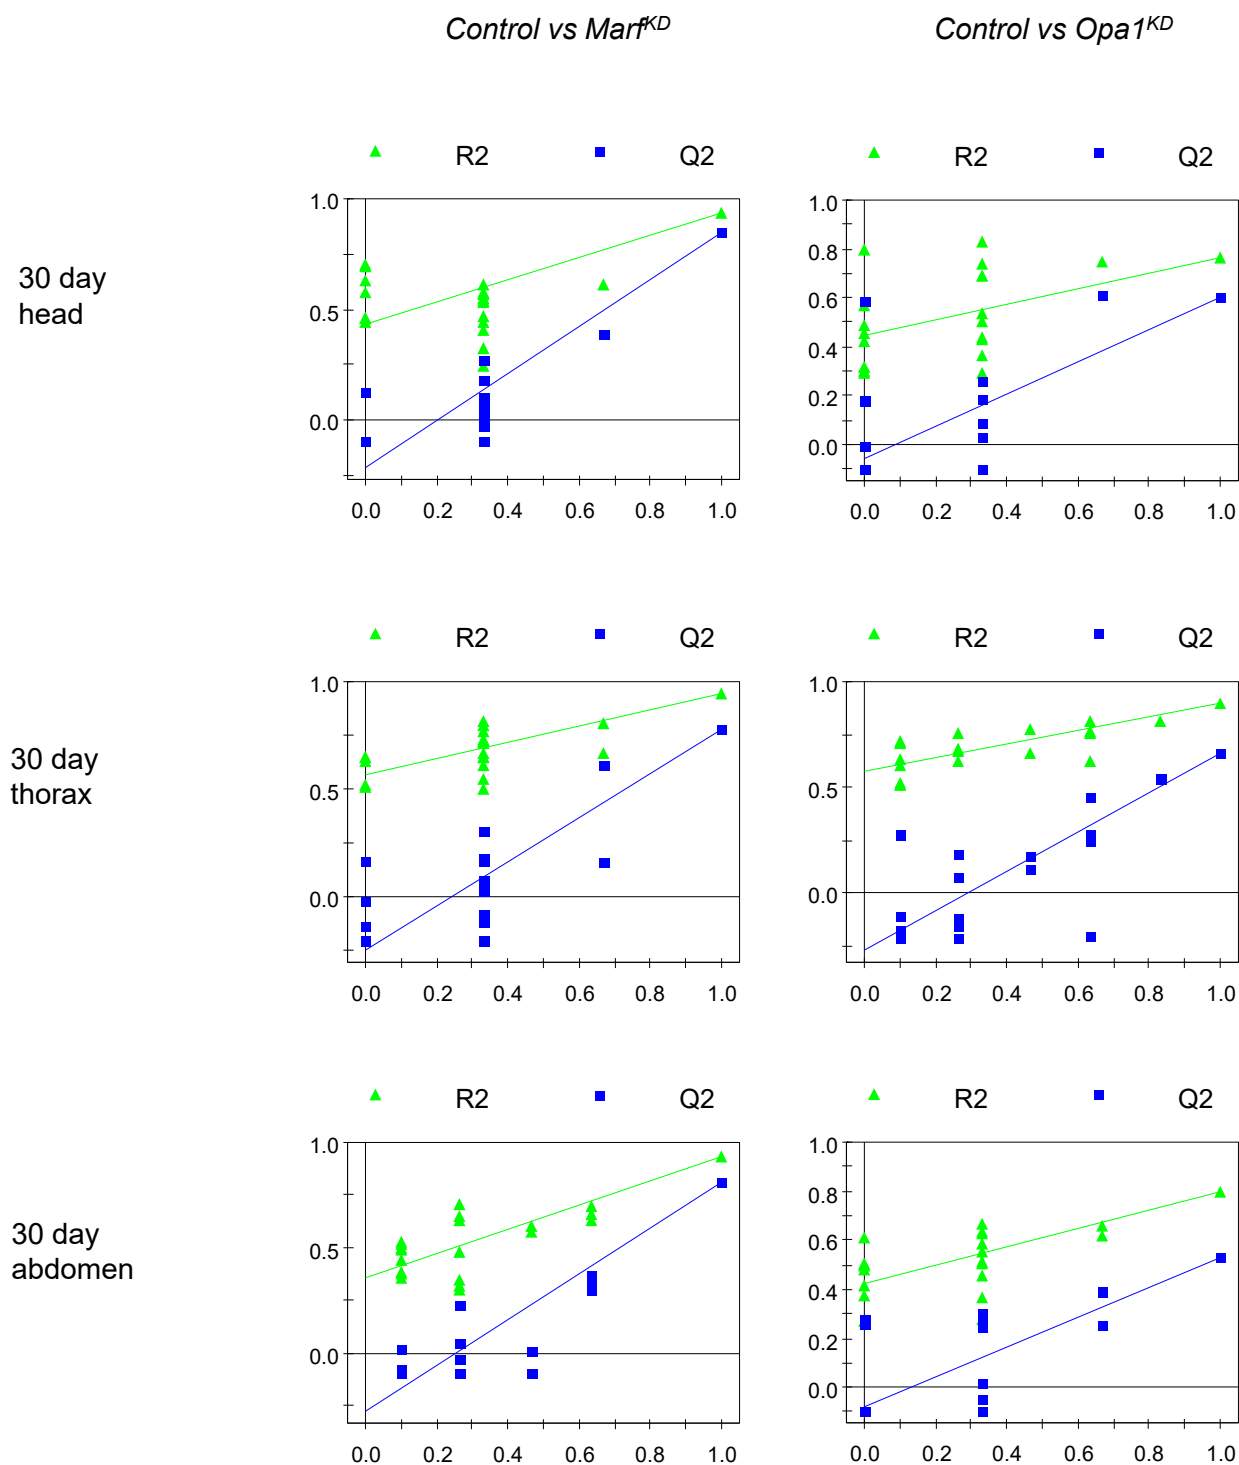

**Figure S2. OPLS by pairs at 30 days.** The anatomical regions of each one of the RNAi lines was compared to the control flies. In all six cases, a good model was found for the separation of the genotypes.

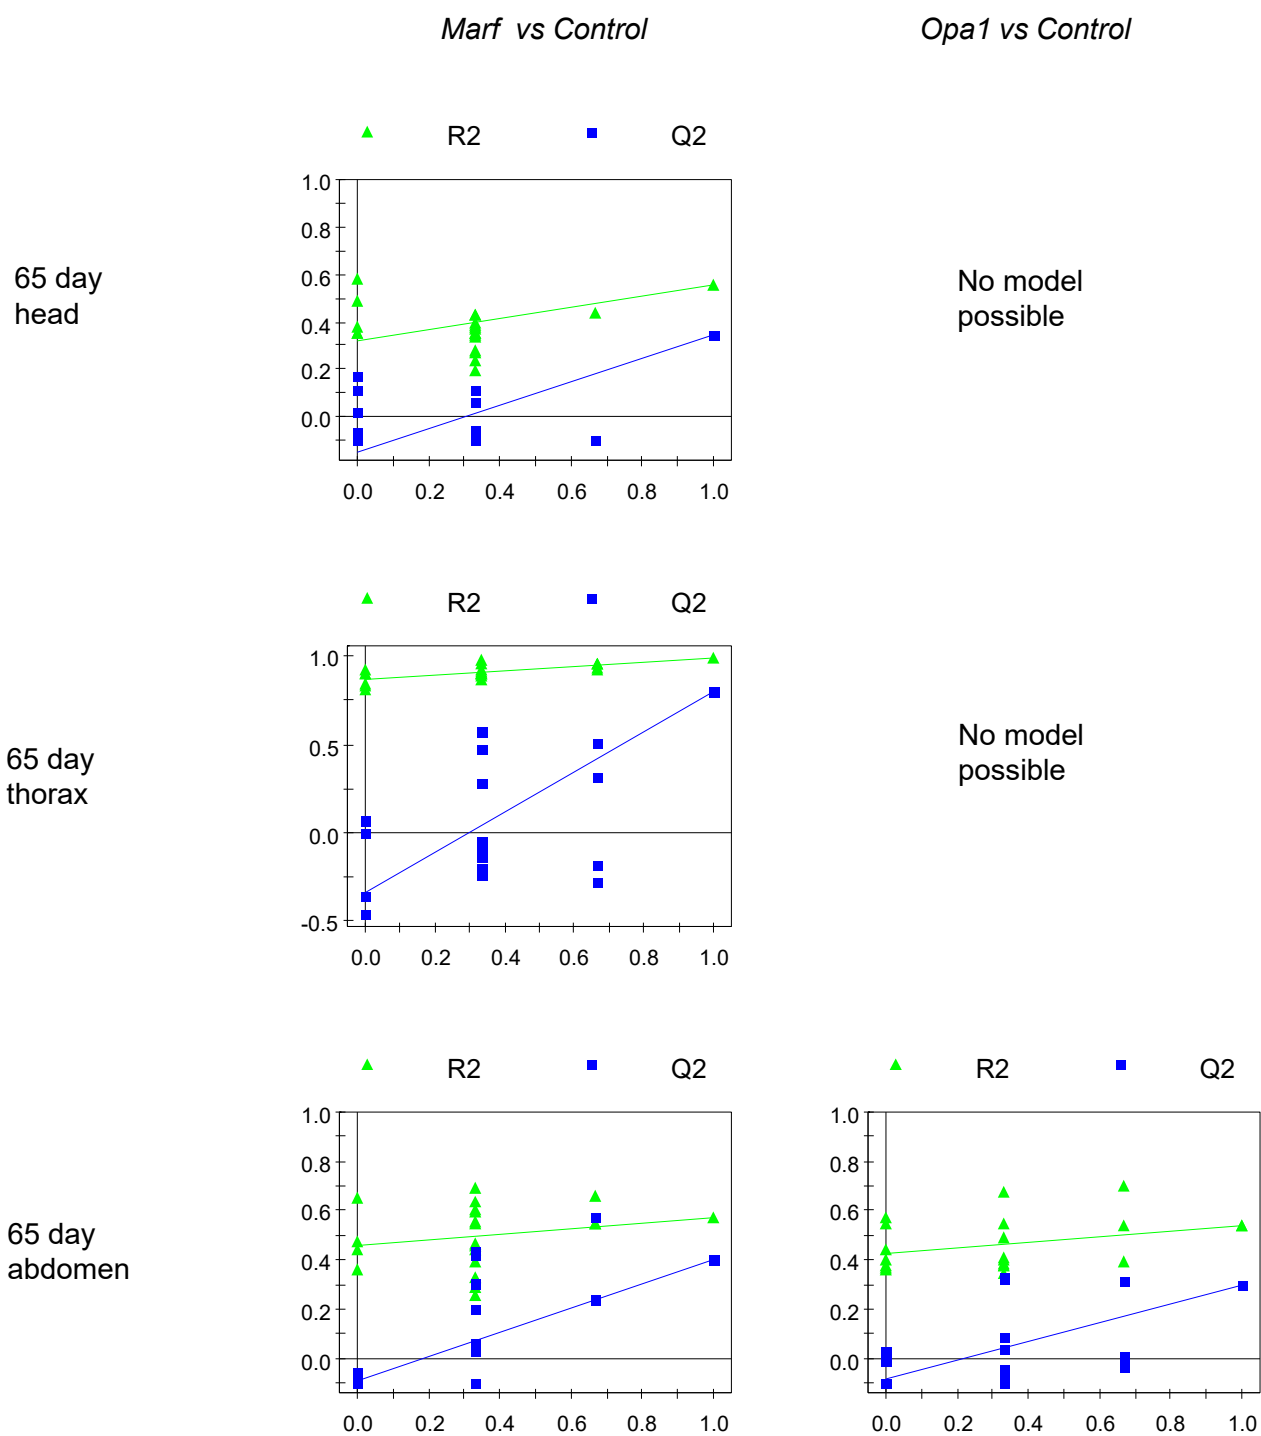

**Figure S3. OPLS by pairs at 65 days.** The anatomical regions of each one of the RNAi lines was compared to the control flies. In this case a model could be found only for four of the six comparisons, and they were less robust than at 30 days.

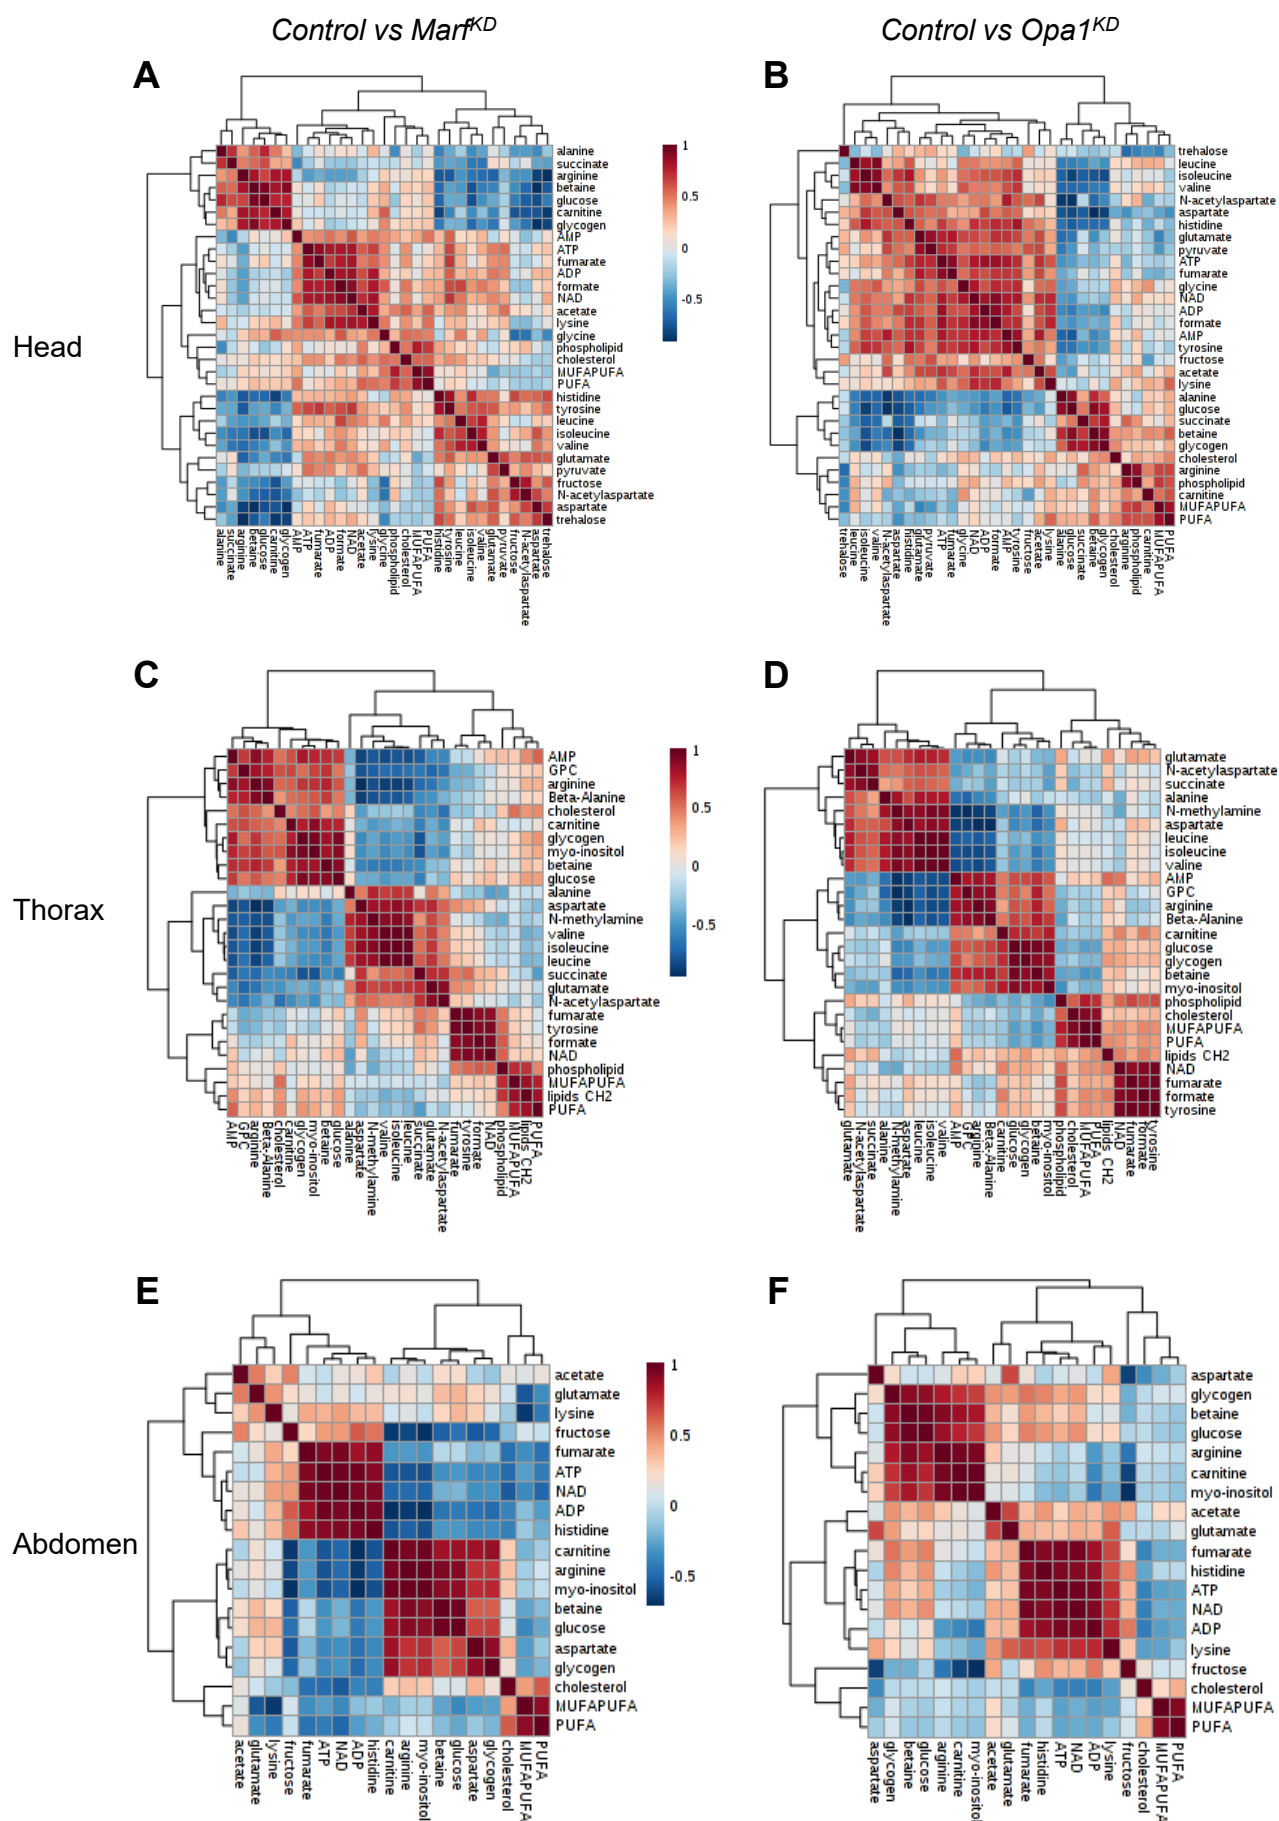

**Figure S4. Correlation matrixes of metabolites at 30 days.** **A.** Heads, Control versus  $Marf^{KD}$ . **B.** Heads, Control versus  $Opa1^{KD}$ . **C.** Thorax, Control versus  $Marf^{KD}$ . **D.** Thorax, Control versus  $Opa1^{KD}$ . **E.** Abdomen, Control versus  $Marf^{KD}$ . **F.** Abdomen, Control versus  $Opa1^{KD}$ .
